# Supplementary material for: IPF-LASSO: IntegrativeL1-Penalized Regression with Penalty Factors for Prediction Based on Multi-Omics Data
Source: Hindawi journal article supplement (doi:10.1155/2017/7691937), 2017-01-01
Supplement: f1 [file 7691937.f1.pdf]

|           | $p_1$ | $p_2$ | $p_1^r$ | $p_2^r$ | $\beta_1$ | $\beta_2$ |
|-----------|-------|-------|---------|---------|-----------|-----------|
| setting A | 1000  | 1000  | 10      | 10      | 0.5       | 0.5       |
|           | 100   | 1000  | 0       | 20      |           | 0.5       |
|           | 100   | 1000  | 0       | 20      |           | 1         |
|           | 100   | 1000  | 0       | 40      |           | 0.5       |
| setting C | 100   | 1000  | 10      | 10      | 0.5       | 0.5       |
|           | 100   | 1000  | 10      | 20      | 0.5       | 0.5       |
| setting D | 100   | 1000  | 20      | 0       | 0.3       |           |
|           | 100   | 1000  | 20      | 0       | 0.5       |           |
|           | 100   | 1000  | 20      | 0       | 1         |           |
| setting B | 100   | 1000  | 20      | 10      | 0.5       | 0.5       |
|           | 100   | 1000  | 3       | 30      | 0.5       | 0.5       |
|           | 100   | 1000  | 3       | 30      | 1         | 0.3       |
|           | 100   | 1000  | 40      | 0       | 0.5       |           |
| setting F | 100   | 100   | 10      | 10      | 0.5       | 0.5       |
|           | 20    | 1000  | 10      | 10      | 0.5       | 0.5       |
|           | 20    | 1000  | 15      | 3       | 0.5       | 0.5       |
|           | 20    | 1000  | 3       | 10      | 1         | 0.3       |
| setting E | 20    | 1000  | 3       | 3       | 1         | 1         |
|           | 20    | 1000  | 5       | 0       | 1         |           |
|           | 20    | 2000  | 0       | 20      |           | 0.5       |
|           | 20    | 2000  | 10      | 10      | 0.5       | 0.5       |
|           | 20    | 2000  | 10      | 10      | 1         | 0.3       |
|           | 20    | 2000  | 1       | 100     | 0.5       | 0.5       |
|           | 20    | 2000  | 20      | 0       | 0.5       |           |
|           | 300   | 800   | 0       | 20      |           | 0.5       |
|           | 300   | 800   | 10      | 10      | 0.5       | 0.5       |
|           | 300   | 800   | 20      | 0       | 0.5       |           |
|           | 300   | 800   | 3       | 8       | 0.8       | 0.8       |
|           | 500   | 500   | 10      | 10      | 0.3       | 0.8       |
|           | 500   | 500   | 10      | 10      | 0.3       | 1.5       |
|           | 500   | 500   | 10      | 10      | 0.4       | 0.7       |
|           | 500   | 500   | 10      | 10      | 0.5       | 0.5       |
|           | 500   | 500   | 20      | 0       | 0.5       |           |
|           | 500   | 500   | 20      | 0       | 1         |           |
|           | 500   | 500   | 20      | 10      | 0.5       | 0.5       |
|           | 500   | 500   | 20      | 20      | 1         | 0.3       |
|           | 500   | 500   | 3       | 3       | 1         | 1.5       |
|           | 500   | 500   | 40      | 0       | 0.3       |           |
|           | 500   | 500   | 40      | 0       | 0.5       |           |

Supplementary Table 1: Parameter settings for the main design (A to F) and the additional simulations.
